# Supplementary material
Source: MDPI journal article supplement (https://www.mdpi.com/2073-4395/12/7/1619)
Supplement: s1 [file s1]

**SupplementaryTable S1** Main assembly parameters and quality metrics

|                                          | <i>culinaris</i> | <i>odemensis1</i> | <i>orientalis</i> | <i>ervoides</i> | <i>tomentosus</i> | <i>lamottei</i> | <i>nigricans</i> | <i>odemensis2</i> |
|------------------------------------------|------------------|-------------------|-------------------|-----------------|-------------------|-----------------|------------------|-------------------|
| total reads                              | 134197218        | 114242395         | 56059412          | 50520358        | 52594645          | 59221485        | 63248353         | 71337421          |
| total assembled bp                       | 160894892        | 153107012         | 118638603         | 121780270       | 108379929         | 121837947       | 124513373        | 121311780         |
| coverage (x)                             | 84.2             | 75.3              | 47.7              | 41.9            | 49.0              | 49.1            | 51.3             | 59.4              |
| proper pairs (%)                         | 97.39            | 97.64             | 96.6              | 96.28           | 97.64             | 97.46           | 96.81            | 98.1              |
| alignmet rate (%)                        | 99.53            | 99.56             | 99.28             | 99.13           | 99.41             | 99.42           | 99.3             | 99.47             |
| transcripts                              | 115224           | 109990            | 88646             | 100273          | 84196             | 92175           | 91441            | 94639             |
| genes                                    | 58375            | 56780             | 47127             | 52022           | 47022             | 49181           | 46742            | 51857             |
| N50 transcript                           | 2206             | 2199              | 2059              | 1906            | 2013              | 2042            | 2055             | 2020              |
| Average transcript                       | 1396             | 1392              | 1338              | 1214            | 1287              | 1322            | 1362             | 1282              |
| Complete Busco (%)                       | 91.4             | 90.8              | 89.8              | 89.2            | 87.1              | 88.2            | 90.7             | 89.2              |
| Annotated transcripts (%)                | 60.7             | 60.9              | 63.8              | 60.6            | 63.4              | 63.3            | 65.5             | 61.7              |
| Uniprot proteins represented (>80%)      | 22243            | 21933             | 20232             | 19856           | 19313             | 20298           | 20865            | 20502             |
| CDC Redberry proteins represented (>80%) | 16052            | 15194             | 14915             | 14733           | 14394             | 14567           | 14804            | 14838             |

## BUSCO Assessment Results

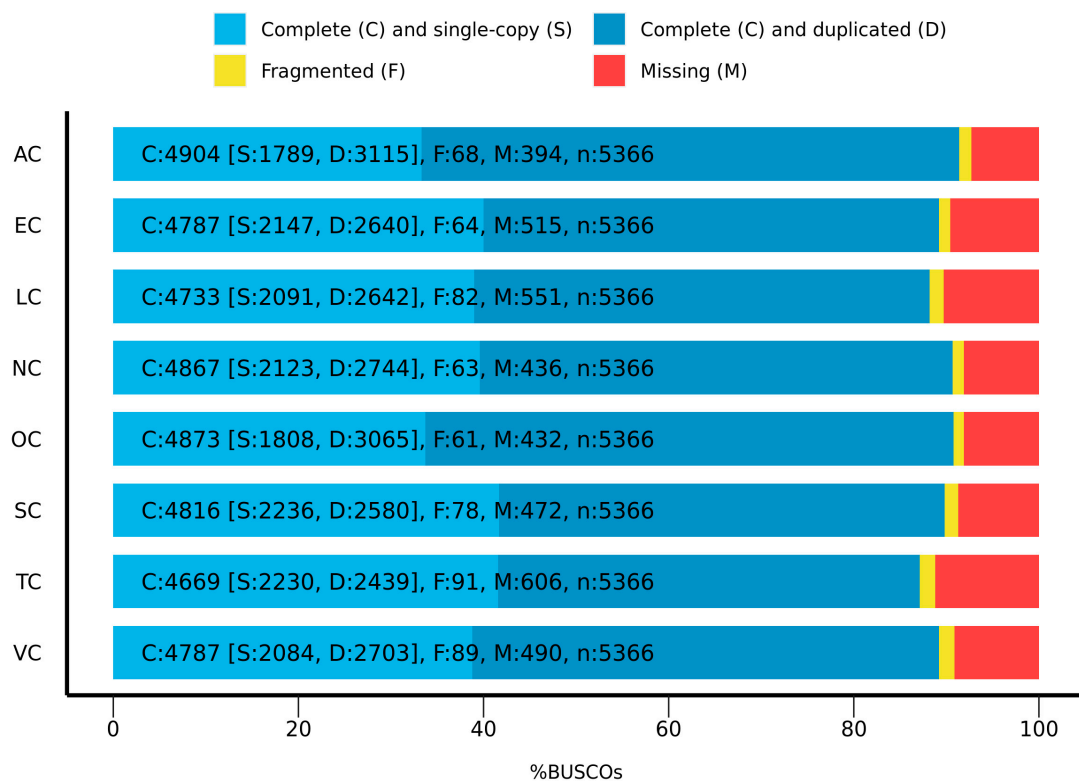

**Figure S1.** BUSCO summary results of the eight assembled transcriptomes. Alp (*Lens culinaris ssp culinaris*, cv *Alpo*), Ori (*L. orientalis*), Tom (*L. tomentosus*), Erv (*L. ervoides*), Lam (*L. lamotei*), Nig (*L. nigricans*), and two *L. odemensis* (Ode1 and Ode2).

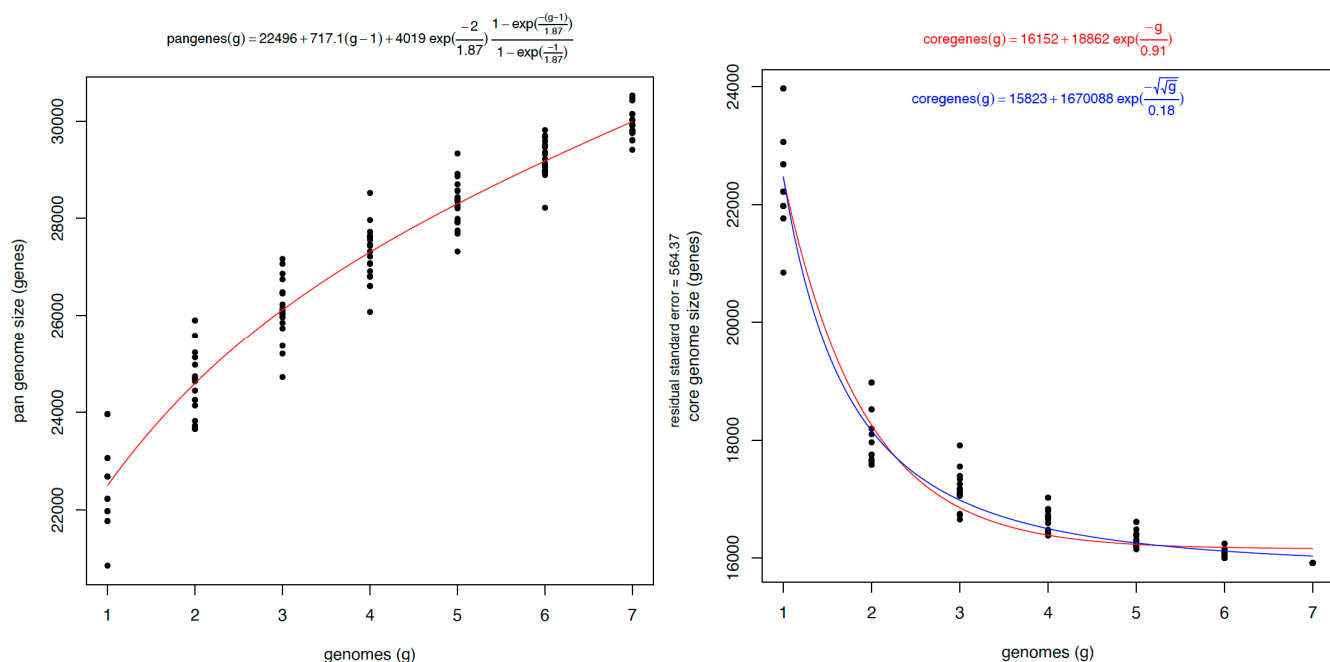

**Figure S2.** Pan-transcriptome simulations modelling the growth of the lentil pan-transcriptome by adding expressed CDS from 7 accessions. DNA-based non-redundant pan-transcriptome size estimates (A) and core transcriptome size (B) based on random samples of 7 transcriptome sets. Simulations was done with all non-redundant clusters. Plots summarize the results of 20 permutations in which input transcriptomes were randomly sorted and added to the pool.

**Supplementary Table S2**

Percentage of conserved sequence clusters shared by pairs of species.

| genomes           | <i>culinaris</i> | <i>lamotei</i> | <i>nigricans</i> | <i>odemensis</i> | <i>orientalis</i> | <i>tomentosus</i> | <i>ervoides</i> |
|-------------------|------------------|----------------|------------------|------------------|-------------------|-------------------|-----------------|
| <i>culinaris</i>  | 100              | 10.88          | 10.70            | 10.42            | 10.91             | 11.19             | 10.50           |
| <i>lamotei</i>    | 10.88            | 100            | 11.43            | 11.11            | 11.66             | 11.98             | 11.19           |
| <i>nigricans</i>  | 10.70            | 11.43          | 100              | 10.93            | 11.46             | 11.77             | 11.01           |
| <i>odemensis</i>  | 10.42            | 11.11          | 10.93            | 100              | 11.14             | 11.43             | 10.71           |
| <i>orientalis</i> | 10.91            | 11.66          | 11.46            | 11.14            | 100               | 12.02             | 11.22           |
| <i>tomentosus</i> | 11.19            | 11.98          | 11.77            | 11.43            | 12.02             | 100               | 11.52           |
| <i>ervoides</i>   | 10.50            | 11.19          | 11.01            | 10.71            | 11.22             | 11.52             | 100             |
